# Supplementary material
Source: ML conference proceedings conference paper supplement (https://openaccess.thecvf.com/content/ICCV2023/html/Fan_Simulating_Fluids_in_ICCV_2023_paper.html)
Supplement: Supplementary file 2 [file Fan_Simulating_Fluids_in_ICCV_2023_supplemental.zip]

Archive with 4 entries (4 files):
- 11051-supp.pdf
- 11051_Comparisons.mp4
- 11051_Comparisons_FullPipeline.mp4
- 11051_Overview.mp4
